# Supplementary material for: Estimating the likelihood of roadway pluvial flood based on crowdsourced traffic data and depression-based DEM analysis
Source: Copernicus journal article supplement (doi:10.5194/nhess-2022-77), 2022-04-04
Supplement: Supplementary file [file nhess-2022-77-AC3-supplement.pdf]

## Responses to RC1:

### Enclosure:

Response letter to the reviewers' comments

- ~~Red~~ texts are removed from the manuscript
- Green texts are added to the manuscript

1. In Section 2.1.1 the authors describe the process for extracting depressions. This is an important and challenging step given the heterogeneity of the urban environment and noise present in high resolution DEM's. The authors manually identify the smallest meaningful flood prone depression. Can you elaborate on the heuristics used to make this choice? For example, if a researcher were to repeat this process in another city, how would you guide them? Also is there any potential to automate this step in the future by perhaps brining in other spatial information such as shape files of roadways?

### Response:

We identified depressions, and their associated depression levels, that were close to or larger than the scale of a road and could affect traffic flow. At present this is a manual process, though it may be possible to develop an automated process that selects depression levels by eliminating levels that result in depressions smaller than the size of a road or traffic lane. We've revised the manuscript at line 122 to clarify this:

"Due to the complexity of urban terrain, the spatial scale of depressions at each hierarchy level is quite variable, and depressions at the same level can be as large as a neighborhood or as small as a pothole. ~~Therefore, we did not set an automated stopping criterion in terms of depression level or depth for the depression filling process. Instead,~~ Initially, depressions at all hierarchical levels are extracted, and the level that has depressions that are at the scale of, and best align with urban features, including roadway curbs and gutters, was manually selected. Flood-prone depressions are then identified by examining overlays of the depressions and Waze flood reports, as well as the areas of depressions and road surfaces that the depression covers. The procedure for using Waze reports to identify depressions is presented in detail in Section 2.1.5."

2. On line 193 the authors mention that several individuals made assessments of which flood alerts to assign to which depressions. Please elaborate on this process. Did these several individuals making the determination together? Or did these individuals make their assessment separately? If it was the later, how much agreement was there between assessments and how did the research team make the final determination? Was this process followed for all 4,996 Waze alerts in the Dallas case?

Response:

The methodology section is updated to emphasize that individuals have performed their analysis separately.

Line 193:

“In this study, several independent individuals were asked to visually assess a map of historical flood alerts laid over surface depressions and assign alerts to depressions separately using the following criteria: a cluster of more than two flood alerts should be available near the depression and the depression must be distinct from other nearby surface depressions. Flood alerts posted from bridges and elevated highways are excluded since BE-DEM does not represent bridge surfaces.”

To present the level of agreement between researchers alert to depression assignment, the following text is added to the manuscript in the results section:

Line 388:

The process of flood alert assignment explained in the methodology section (Section 2.1.5) was performed for the 4,996 flood alerts in the Dallas case study by several independent individuals. With the criteria given previously, there was 90.5% agreement between the annotators in the assignment of alerts to depressions. The first author reviewed alerts that indicated disagreement and if the specified criteria for making the assignment were met, she completed the assignments using best judgment. Among the 4,996 flood alerts that were filtered, 2,665 alerts were assigned to 191 independent surface depressions using the approach described in the methodology section (Section 2.1.5).

3. In the EB model, how was the weighting factor,  $w$ , determined? Is  $w$  also a calibrated parameter?

Response:

“ $w$ ” is a function of the negative binomial distribution parameters (Equation 3). The manuscript is updated as follows to make it more transparent.

$$\text{Equation 2: } EB(y) = w \times \mu + (1 - w) \times y$$

$$\text{Equation 3: } P(y) = \frac{\Gamma(y + \phi)}{\Gamma(y + 1)\Gamma(\phi)} \left(\frac{\phi}{\phi + \mu}\right)^\phi \left(\frac{\mu}{\mu + \phi}\right)^y$$

Line 255:

It can be shown that the weight  $w$  in the EB equation based on the NB regression is calculated as  $\phi/\mu + \phi$ , hence we can rewrite Equation 2 as Equation 6. [ϕ is the NB parameter \(Equation 3\) estimated using Maximum likelihood estimation.](#) For more information regarding the mathematics of deriving the EB weight factor, refer to Zou et al. (2017).

$$\text{Equation 6: } EB(y) = \frac{\phi}{\mu + \phi} \mu + \frac{\mu}{\mu + \phi} y$$

4. **In section 2.1.4 of the methodology it was not clear how were three precipitation categories selected. The authors mention agglomerative clustering but not what selection criteria was used. The criteria is mentioned in the Case study pre-processing section, but I recommend moving it up to the methods section.**

Response:

To address this comment, the following text is replaced from line 471 to line 173 of the manuscript:

To define the optimum clusters, the Ward linkage method was used to minimize the total within-cluster variance (Edelbrock, 1979). In this method, increases in within-cluster variance are minimized to find the optimum pair of clusters to merge.

5. **In the discussion section, please include a discussion of the limitations of the data sets and models presented.**

Response:

The discussion section is updated to reflect the limitations of the dataset and models as follows:

Added to line 469:

Furthermore, the approach taken in this study only considers flood-prone locations reported by Waze users. Numerous parameters affect human exposure to flooded locations, such as the number of Waze users that pass a road segment, road type, road function, day of week, and time of day. Hence, a similar flood extent on the road can cause significantly different magnitudes of traffic disruption at different times and locations, and, therefore, different flood

reports. Data-driven models also have limitations due to the previously discussed dataset constraints.

The EB model accounts for heterogeneity by utilizing historical frequencies. However, this does introduce a bias towards more frequently traveled routes, as discussed in Section 2.1.5, and the EB model estimates will be skewed and less accurate for depressions situated on local and less-traveled routes. While major routes are more important than minor routes for minimizing exposure and risk, we do acknowledge this as an unavoidable limitation. It is possible that, with more data, an approach to extrapolating findings on major roads to minor roads could be developed. To develop a more unbiased flood prediction model, we suggest that crowdsourced data be used as complementary data in conjunction with other data sources and models to account for less frequently traveled areas and times (e.g., during the Covid-19 pandemic, which was not included in this study when traffic was significantly reduced).

Minor comments:

- 1. Line 40, in addition to speed limits when driving through water, full loss of control is also possible. "As little as one foot of water can move most cars off the road." NWS 2011.**

Response:

The introduction is updated as follows:

Line 42:

For example, Pregolato et al. (2017) estimated that a driver facing 10 cm of standing water must not drive faster than 40 km/hr to maintain safe driving, stopping, and steering without loss of control. Furthermore, according to the National Weather Service (NWS 2011) 30 cm of standing water can be sufficient to float most cars.

- 2. In preprocessing the Waze data (Section 2.1.5), is there information on direction of travel? If so, is that information used to constrain the possible flooded locations?**

Waze data do not provide the direction of travel. However, no constraints regarding the travel direction have been used for assigning flood alerts to flooded depressions, since depressions can cross both sides of the road. The methodology section is updated as follows to clarify that travelers might post a flood alert on either side of a flooded location.

Line 191:

Posting a flood alert requires Waze users to complete three steps (three selections) in the app while driving or riding, and, as a result flood alerts may be posted some distance along the

roadway in either direction from the flooded road segment. Waze data do not provide direction of travel; Hence assigning flood alerts to the proper depression must be done carefully.”

3. In Figure 1, why does the last bullet point of the central section read “Alerts/depressions.” Please clarify.

It is changed to “Assignment of alerts to depressions”:

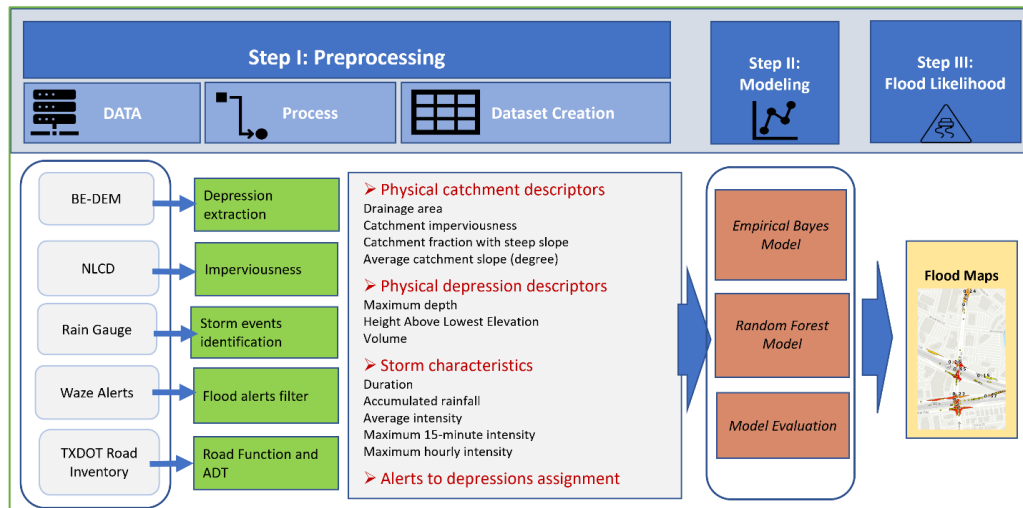

Figure 1. Methodology

4. Figure 6: It is hard for the viewer to make accurate comparisons between pie charts (see Helsel et al. 2020). I suggest replacing this figure with a bar graph. Additionally, the font sizes vary notable between Fig 6a and 6b.

The figure is changed to a bar chart, shown below.

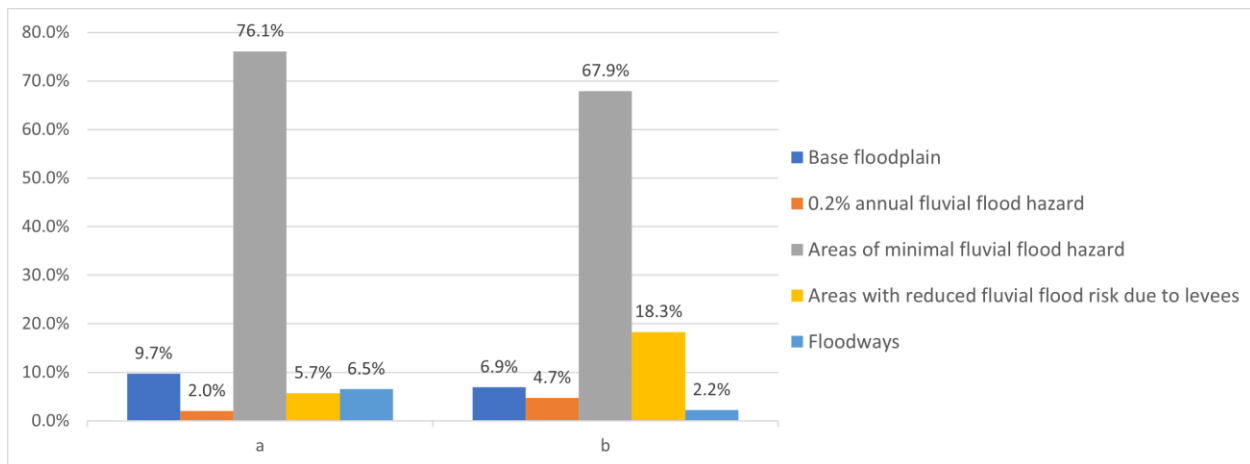

Figure 6. a: Distribution of NFHL flood zone areas across the study region, b: Flood alerts in NFHL flood zones

**5. A sentence in the text could substitute for Table 5.**

Table 5 is removed and the following changes are made in Lines 411:

To minimize the impact of particular train-test datasets on the model's performance, the dataset is randomly split 50 times and the model performance statistics are re-evaluated for each split. ~~Table 5 compares statistics on EB and RF model performances for 50 runs.~~ The EB model has an average MAE of 0.89, as opposed to the average MAE of 1.92 attained by the RF model. EB's predictive capability is also more stable across the 50 runs than the RF model, with MAE standard deviations of 0.11 and 0.18, respectively.

**6. Add the results for the RF model to Table 6 as well for comparison.**

The table is changed and the updated version is shown below.

|                             | MAE of train set |          |        |       | MAE of test set |          |        |       |
|-----------------------------|------------------|----------|--------|-------|-----------------|----------|--------|-------|
|                             | Light            | Moderate | Severe | Total | Light           | Moderate | Severe | Total |
| Total average               | 1.88             | 2.01     | 2.53   | 2.14  | 2.19            | 1.93     | 3.04   | 2.37  |
| Storm cluster based average | 0.95             | 1.97     | 2.52   | 1.82  | 1.16            | 1.86     | 2.72   | 1.89  |
| NB regression               | 0.94             | 1.91     | 2.37   | 1.74  | 1.16            | 1.65     | 2.75   | 1.82  |
| Empirical Bayes             | 0.69             | 1.01     | 0.93   | 0.88  | 0.84            | 0.85     | 1.09   | 0.92  |
| Random Forest               | 0.68             | 0.98     | 0.91   | 0.86  | 1.34            | 1.66     | 2.76   | 1.92  |

7. Figure 16: include numeric probabilities associated with high, moderate, etc. flooding on the figure or in the caption.

The figure is changed, with the new version shown below.

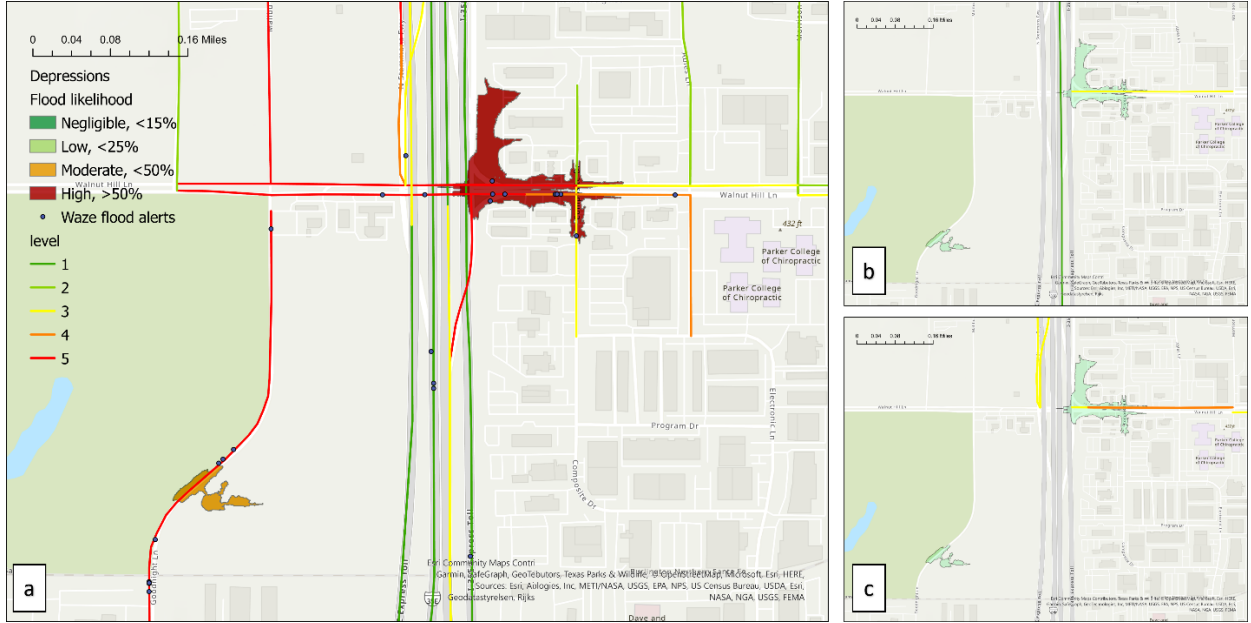

Figure 16. Severe storm PFF probability map versus flood alerts and traffic jams on a. Friday, September 22<sup>nd</sup> (the date of a severe storm), b. Friday, September 29<sup>th</sup>, 2018. and c. Friday, September 15<sup>th</sup>, 2018
